# Supplementary material
Source: MDPI journal article supplement (https://www.mdpi.com/1996-1073/13/17/4533)
Supplement: s1 [file s1]

## Supplementary Material

### 1. Parameters for calculating CAFE standards

**Error! Reference source not found.** gives the parameters used for calculating CAFE standards with respect to fuel efficiency and GHG emissions. All parameters to be achieved by 2020 are given in the report ‘Vehicle Fuel Economy and CO<sub>2</sub> Emissions: Data and Analyses’ by the Korea Energy Agency ([http://bpms.kemco.or.kr/transport\\_2012/pds/month\\_pds.aspx](http://bpms.kemco.or.kr/transport_2012/pds/month_pds.aspx)). In particular, the assumption of  $\alpha'$  in 2030 (84) in **Error! Reference source not found.** is assumed based on information on historical standards as:

During the second period (2012-2015), the target was achieving 17km/liter or 140g/km.

During the third period (2016-2020), the target was achieving 24.3km/liter or 97g/km.

The ratio of the targets between the second and third period:  $17/24.3 = 0.6996$  and  $97/140 = 0.6929$ . Now we know the new target as 28.1 km/liter with no information of GHG emission standards yet. This study assumes  $\alpha'$  in 2030 as  $84 = 97 * (24.3/28.1)$ . Likewise, the other parameters can also be assumed in such a way. The 2025 parameters are applied as median values between the values in 2020 and 2030, except for  $w$  (curb weight).

**Table 1.** Parameters for calculating CAFE standards.

| Year | Parameters for Calculating Average Fuel Efficiency |          |          | Parameters for Calculating Average GHG Emissions |          |        |           |
|------|----------------------------------------------------|----------|----------|--------------------------------------------------|----------|--------|-----------|
|      | $\alpha$                                           | $\beta$  | $\delta$ | $\alpha'$                                        | $\beta'$ | $w$    | $\delta'$ |
| 2016 | 31.136                                             | 0.008548 | 22.0     | 127                                              | 0.0533   | 1421.8 | 108.2     |
| 2017 | 32.140                                             | 0.008824 | 22.7     | 123                                              | 0.0517   | 1421.8 | 104.8     |
| 2018 | 32.810                                             | 0.009008 | 23.2     | 120                                              | 0.0504   | 1421.8 | 102.3     |
| 2019 | 35.823                                             | 0.009835 | 25.3     | 110                                              | 0.0462   | 1421.8 | 93.7      |
| 2020 | 40.678                                             | 0.11168  | 28.7     | 97                                               | 0.0407   | 1421.8 | 82.7      |
| 2025 |                                                    |          |          | 90.5                                             | 0.0380   | 1420   | 77.2      |
| 2030 |                                                    |          |          | 84                                               | 0.0352   | 1420   | 71.6      |

### 2. Assumptions for calculating CAFE performance

Based on the sales of car models in 2018, the representative car models are selected for calculating average GHG emission performance of CAFE standards and performance using GCAM, as shown in **Error! Reference source not found.**

**Table 2.** Representative car models selected by modes (source: Hyundai (<https://www.hyundai.com/kr/en/main>) and Kia (<https://www.kia.com/kr/main.html>)).

| Mode         | Model    | Sales Volumes in 2018 | Curb Weight (kg) | Fuel Efficiency (km/liter) | CO <sub>2</sub> Emissions (g/km) |
|--------------|----------|-----------------------|------------------|----------------------------|----------------------------------|
| SUV          | SANTAFE  | 99,143                | 1925             | 12.3                       | 156                              |
| Large Sedan  | GRANDEUR | 88,533                | 1575             | 11.9                       | 129                              |
| Medium Sedan | SONATA   | 61,724                | 1415             | 12.9                       | 106                              |
| Small Sedan  | MORNING  | 59,042                | 910              | 15.7                       | 104                              |

### 3. Assumptions for Socioeconomics

According to definitions (SSP1: Sustainability, SSP2: Middle of the Road, SSP3: Fragmentation, SSP4: Inequality, SSP5: Conventional Development), this study adopts the SSP2 scenario for its moderate pathway, which is represented in **Error! Reference source not found.** For more details and references, please visit: <http://jgcri.github.io/gcam-doc/macro-econ.html> and <http://jgcri.github.io/gcam-doc/ssp.html>

**Table 3.** Assumptions for socioeconomics.

| year | Population<br>(Thousand) | GDP<br>(Million 2015US\$) | GDP per Capita<br>(Thousand<br>2015US\$) |
|------|--------------------------|---------------------------|------------------------------------------|
| 2020 | 49,378                   | 1,671,164                 | 33.84                                    |
| 2025 | 49,641                   | 1,954,094                 | 39.36                                    |
| 2030 | 49,661                   | 2,215,327                 | 44.60                                    |
| 2035 | 49,342                   | 2,448,359                 | 49.62                                    |
| 2040 | 48,630                   | 2,652,051                 | 54.53                                    |
| 2045 | 47,560                   | 2,830,948                 | 59.52                                    |
| 2050 | 46,183                   | 2,981,477                 | 64.55                                    |

#### 4. Assumptions for vehicle costs

Assumptions for vehicles costs are taken from previous studies (Lutsey and Nicholas, 2019; Morrison et al., 2018; Ruffini and Wei, 2018; Soulopoulos, 2017). **Error! Reference source not found.** summarizes ICEVs and BEVs' cost assumptions in previous studies and in this study. **Error! Reference source not found.** summarizes BEVs and FCEVs' cost assumptions in previous studies and in this study. **Error! Reference source not found.** summarizes the overall cost assumptions used in this study.

- ICEV costs  
Lutesy and Nicholas (2019) and Soulopoulos (2017) expect ICEV costs to increase slightly because of light-weighting and other measures taken for reducing emissions. Ruffini and Wei (2015) expect ICEV costs to be constant during 2020-2050. In our study ICEV costs are kept constant over all periods.
- Cost parity (BEV vs ICEV)  
Lutesy and Nicholas (2019), Soulopoulos (2017), and Ruffini and Wei (2015) expect BEVs to reach cost parity with ICEVs during 2020-2030. In our study BEVs will reach cost parity with ICEVs in 2025.
- BEV costs since 2030  
Ruffini and Wei (2015) expect BEV costs not to decline any more after 2030. In our study BEV costs are kept constant since 2030.
- Cost parity (BEV vs FCEV)  
Morrison et al. (2018), found that FCEVs will reach cost parity with BEVs-150 (BEVs with a 150-mile range) around 2025. In our study FCEVs will reach cost parity with BEVs in 2025.

**Table 4.** ICEV and BEV cost assumptions in previous studies and in this study.

| Source                           | Vehicle          | 2020 | 2030 | 2040 | 2050 |
|----------------------------------|------------------|------|------|------|------|
| Lutesy and<br>Nicholas<br>(2019) | ICEV             | 42   | 43   | -    | -    |
|                                  | BEV              | 51   | 36   | -    | -    |
|                                  | Ratio (BEV/ICEV) | 125% | 84%  | -    | -    |

|                           |                 |                     |      |      |      |      |
|---------------------------|-----------------|---------------------|------|------|------|------|
| Soulopoulos<br>(2017)     |                 | ICEV                | 28   | 30   | -    | -    |
|                           |                 | BEV                 | 35   | 26   | -    | -    |
|                           |                 | Ratio (BEV/ICEV)    | 121% | 84%  |      |      |
| Ruffini and<br>Wei (2018) |                 | ICEV                | 52.5 | 52.5 | 52.5 | 52.5 |
|                           |                 | BEV                 | 54   | 49   | 49   | 49   |
|                           |                 | Ratio (BEV/ICEV)    | 103% | 93%  | 93%  | 93%  |
| This study                | Small<br>Sedan  | ICEV                | 22.3 | 22.3 | 22.3 | 22.3 |
|                           |                 | BEV                 | 26.8 | 19.0 | 19.0 | 19.0 |
|                           |                 | Ratio<br>(BEV/ICEV) | 120% | 85%  | 85%  | 85%  |
|                           | Medium<br>Sedan | ICEV                | 31.7 | 31.7 | 31.7 | 31.7 |
|                           |                 | BEV                 | 38.1 | 27.0 | 27.0 | 27.0 |
|                           |                 | Ratio<br>(BEV/ICEV) | 120% | 85%  | 85%  | 85%  |
|                           | Large<br>Sedan  | ICEV                | 53.7 | 53.7 | 53.7 | 53.7 |
|                           |                 | BEV                 | 64.4 | 45.6 | 45.6 | 45.6 |
|                           |                 | Ratio<br>(BEV/ICEV) | 120% | 85%  | 85%  | 85%  |
|                           | SUV             | ICEV                | 55.2 | 55.2 | 55.2 | 55.2 |
|                           |                 | BEV                 | 66.2 | 46.9 | 46.9 | 46.9 |
|                           |                 | Ratio<br>(BEV/ICEV) | 120% | 85%  | 85%  | 85%  |

**Table 5.** BEV and FCEV cost assumptions in previous studies and in this study.

| Source                 | Size                                                          | Vehicle             | 2020                | 2025 | 2030 | 2035 | 2040 |      |
|------------------------|---------------------------------------------------------------|---------------------|---------------------|------|------|------|------|------|
| Morrison et al. (2018) | Compact                                                       | BEV                 | 0.53                | 0.45 | 0.38 | 0.33 | 0.32 |      |
|                        |                                                               | FCEV                | 0.62                | 0.44 | 0.32 | 0.28 | 0.29 |      |
|                        |                                                               | Ratio<br>(FCEV/BEV) | 117%                | 98%  | 84%  | 85%  | 91%  |      |
|                        | Midsize                                                       | BEV                 | 0.56                | 0.48 | 0.41 | 0.36 | 0.34 |      |
|                        |                                                               | FCEV                | 0.62                | 0.49 | 0.34 | 0.30 | 0.30 |      |
|                        |                                                               | Ratio<br>(FCEV/BEV) | 111%                | 102% | 83%  | 83%  | 88%  |      |
|                        | BEV-150 (BEV with a 150-mile range) is selected for reference | Small SUV           | BEV                 | 0.61 | 0.53 | 0.46 | 0.39 | 0.37 |
|                        |                                                               |                     | FCEV                | 0.77 | 0.52 | 0.38 | 0.33 | 0.32 |
|                        |                                                               |                     | Ratio<br>(FCEV/BEV) | 126% | 98%  | 83%  | 85%  | 86%  |
| Large SUV              |                                                               | BEV                 | 0.66                | 0.58 | 0.49 | 0.43 | 0.40 |      |
|                        |                                                               | FCEV                | 0.82                | 0.57 | 0.40 | 0.37 | 0.34 |      |
|                        |                                                               | Ratio<br>(FCEV/BEV) | 124%                | 98%  | 82%  | 86%  | 85%  |      |
| This Study             |                                                               | Small<br>Sedan      | BEV                 | 26.8 | 22.3 | 19.0 | 19.0 | 19.0 |
|                        |                                                               |                     | FCEV                | 31.3 | 22.3 | 15.9 | 15.9 | 15.9 |
|                        |                                                               |                     | Ratio<br>(FCEV/BEV) | 117% | 100% | 84%  | 84%  | 84%  |
|                        | Medium<br>Sedan                                               | BEV                 | 38.1                | 31.7 | 27.0 | 27.0 | 27.0 |      |
|                        |                                                               | FCEV                | 42.3                | 31.7 | 22.4 | 22.4 | 22.4 |      |
|                        |                                                               | Ratio<br>(FCEV/BEV) | 111%                | 100% | 83%  | 83%  | 83%  |      |

Units: thousand \$/veh



|                |      |                                                    |      |      |      |      |      |      |
|----------------|------|----------------------------------------------------|------|------|------|------|------|------|
|                |      | Operating costs<br>(registration and<br>insurance) | 5.0  | 5.0  | 5.0  | 5.0  | 5.0  | 5.0  |
|                |      | Capital costs<br>(infrastructure)                  | 1.0  | 0.9  | 0.7  | 0.7  | 0.7  | 0.7  |
|                |      | Capital costs (other)                              | 4.6  | 3.8  | 3.3  | 3.3  | 3.3  | 3.3  |
|                | BEV  | Capital costs<br>(purchase)                        | 24.8 | 20.7 | 17.6 | 17.6 | 17.6 | 17.6 |
|                |      | Operating costs<br>(maintenance)                   | 3.3  | 2.7  | 2.3  | 2.3  | 2.3  | 2.3  |
|                |      | Operating costs<br>(registration and<br>insurance) | 4.3  | 3.6  | 3.0  | 3.0  | 3.0  | 3.0  |
|                |      | Capital costs<br>(infrastructure)                  | 5.2  | 3.9  | 2.8  | 2.8  | 2.8  | 2.8  |
|                |      | Capital costs (other)                              | 4.4  | 3.3  | 2.3  | 2.3  | 2.3  | 2.3  |
|                | FCEV | Capital costs<br>(purchase)                        | 23.7 | 17.8 | 12.6 | 12.6 | 12.6 | 12.6 |
|                |      | Operating costs<br>(maintenance)                   | 4.1  | 3.1  | 2.2  | 2.2  | 2.2  | 2.2  |
|                |      | Operating costs<br>(registration and<br>insurance) | 4.8  | 3.6  | 2.5  | 2.5  | 2.5  | 2.5  |
|                |      | Capital costs<br>(infrastructure)                  | 0.0  | 0.0  | 0.0  | 0.0  | 0.0  | 0.0  |
|                |      | Capital costs (other)                              | 7.8  | 7.8  | 7.8  | 7.8  | 7.8  | 7.8  |
|                | ICEV | Capital costs<br>(purchase)                        | 31.0 | 31.0 | 31.0 | 31.0 | 31.0 | 31.0 |
|                |      | Operating costs<br>(maintenance)                   | 4.4  | 4.4  | 4.4  | 4.4  | 4.4  | 4.4  |
|                |      | Operating costs<br>(registration and<br>insurance) | 10.5 | 10.5 | 10.5 | 10.5 | 10.5 | 10.5 |
|                |      | Capital costs<br>(infrastructure)                  | 1.0  | 0.8  | 0.7  | 0.7  | 0.7  | 0.7  |
|                |      | Capital costs (other)                              | 10.2 | 8.5  | 7.3  | 7.3  | 7.3  | 7.3  |
| Large<br>Sedan | BEV  | Capital costs<br>(purchase)                        | 41.0 | 34.1 | 29.0 | 29.0 | 29.0 | 29.0 |
|                |      | Operating costs<br>(maintenance)                   | 3.1  | 2.6  | 2.2  | 2.2  | 2.2  | 2.2  |
|                |      | Operating costs<br>(registration and<br>insurance) | 9.2  | 7.6  | 6.5  | 6.5  | 6.5  | 6.5  |
|                |      | Capital costs<br>(infrastructure)                  | 6.4  | 4.3  | 3.0  | 3.0  | 3.0  | 3.0  |
|                |      | Capital costs (other)                              | 11.2 | 7.4  | 5.2  | 5.2  | 5.2  | 5.2  |
|                | FCEV | Capital costs<br>(purchase)                        | 44.8 | 29.6 | 20.9 | 20.9 | 20.9 | 20.9 |
|                |      | Operating costs<br>(maintenance)                   | 5.1  | 3.4  | 2.4  | 2.4  | 2.4  | 2.4  |

|                 |      |                                                    |                                                    |      |      |      |      |      |      |     |
|-----------------|------|----------------------------------------------------|----------------------------------------------------|------|------|------|------|------|------|-----|
|                 |      | Operating costs<br>(registration and<br>insurance) | 13.6                                               | 9.0  | 6.4  | 6.4  | 6.4  | 6.4  | 6.4  |     |
|                 |      | Capital costs<br>(infrastructure)                  | 0.0                                                | 0.0  | 0.0  | 0.0  | 0.0  | 0.0  | 0.0  |     |
|                 |      | Capital costs (other)                              | 7.8                                                | 7.8  | 7.8  | 7.8  | 7.8  | 7.8  | 7.8  |     |
|                 | ICEV | Capital costs<br>(purchase)                        | 31.0                                               | 31.0 | 31.0 | 31.0 | 31.0 | 31.0 | 31.0 |     |
|                 |      | Operating costs<br>(maintenance)                   | 4.9                                                | 4.9  | 4.9  | 4.9  | 4.9  | 4.9  | 4.9  |     |
|                 |      | Operating costs<br>(registration and<br>insurance) | 11.5                                               | 11.5 | 11.5 | 11.5 | 11.5 | 11.5 | 11.5 |     |
|                 |      | Capital costs<br>(infrastructure)                  | 0.9                                                | 0.8  | 0.7  | 0.7  | 0.7  | 0.7  | 0.7  |     |
|                 |      | Capital costs (other)                              | 10.5                                               | 8.7  | 7.4  | 7.4  | 7.4  | 7.4  | 7.4  |     |
|                 | SUV  | Capital costs<br>(purchase)                        | 41.9                                               | 34.9 | 29.7 | 29.7 | 29.7 | 29.7 | 29.7 |     |
|                 |      | BEV                                                | Operating costs<br>(maintenance)                   | 3.3  | 2.7  | 2.3  | 2.3  | 2.3  | 2.3  | 2.3 |
|                 |      |                                                    | Operating costs<br>(registration and<br>insurance) | 9.6  | 8.0  | 6.8  | 6.8  | 6.8  | 6.8  | 6.8 |
|                 |      | Capital costs<br>(infrastructure)                  | 5.7                                                | 3.8  | 2.6  | 2.6  | 2.6  | 2.6  | 2.6  |     |
|                 |      | Capital costs (other)                              | 11.7                                               | 7.8  | 5.5  | 5.5  | 5.5  | 5.5  | 5.5  |     |
|                 | FCEV | Capital costs<br>(purchase)                        | 46.6                                               | 31.3 | 21.8 | 21.8 | 21.8 | 21.8 | 21.8 |     |
|                 |      | Operating costs<br>(maintenance)                   | 5.0                                                | 3.4  | 2.4  | 2.4  | 2.4  | 2.4  | 2.4  |     |
|                 |      | Operating costs<br>(registration and<br>insurance) | 13.1                                               | 8.8  | 6.1  | 6.1  | 6.1  | 6.1  | 6.1  |     |
| Small<br>Sedan  | ICEV | Total                                              | 22.3                                               | 22.3 | 22.3 | 22.3 | 22.3 | 22.3 | 22.3 |     |
|                 | BEV  | Total                                              | 26.8                                               | 22.3 | 19.0 | 19.0 | 19.0 | 19.0 | 19.0 |     |
|                 | FCEV | Total                                              | 31.3                                               | 22.3 | 15.9 | 15.9 | 15.9 | 15.9 | 15.9 |     |
| Medium<br>Sedan | ICEV | Total                                              | 31.7                                               | 31.7 | 31.7 | 31.7 | 31.7 | 31.7 | 31.7 |     |
|                 | BEV  | Total                                              | 38.1                                               | 31.7 | 27.0 | 27.0 | 27.0 | 27.0 | 27.0 |     |
|                 | FCEV | Total                                              | 42.3                                               | 31.7 | 22.4 | 22.4 | 22.4 | 22.4 | 22.4 |     |
| Large<br>Sedan  | ICEV | Total                                              | 53.7                                               | 53.7 | 53.7 | 53.7 | 53.7 | 53.7 | 53.7 |     |
|                 | BEV  | Total                                              | 64.4                                               | 53.7 | 45.6 | 45.6 | 45.6 | 45.6 | 45.6 |     |
|                 | FCEV | Total                                              | 81.1                                               | 53.7 | 37.9 | 37.9 | 37.9 | 37.9 | 37.9 |     |
| SUV             | ICEV | Total                                              | 55.2                                               | 55.2 | 55.2 | 55.2 | 55.2 | 55.2 | 55.2 |     |
|                 | BEV  | Total                                              | 66.2                                               | 55.2 | 46.9 | 46.9 | 46.9 | 46.9 | 46.9 |     |
|                 | FCEV | Total                                              | 82.1                                               | 55.2 | 38.4 | 38.4 | 38.4 | 38.4 | 38.4 |     |
